# Supplementary material
Source: HighWire-hosted journal article supplement (https://erj.ersjournals.com/content/61/2/2201062)
Supplement: inline-supplementary-material-2 [file inline-supplementary-material-2.pdf]

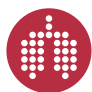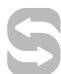

SHAREABLE PDF

# ERS/ESTS statement on the management of pleural infection in adults

Eihab O. Bedawi <sup>1,2,3,4</sup>, Sara Ricciardi <sup>5,6</sup>, Maged Hassan <sup>7</sup>, Michael R. Gooseman <sup>8</sup>, Rachelle Asciak <sup>9,10</sup>, Olalla Castro-Añón <sup>11,12</sup>, Karin Armbruster <sup>13</sup>, Martina Bonifazi <sup>14,15</sup>, Sarah Poole <sup>16</sup>, Elinor K. Harris <sup>17</sup>, Stefano Elia <sup>18,19</sup>, Rafal Krenke <sup>20</sup>, Alessandro Mariani <sup>21</sup>, Nick A. Maskell <sup>22</sup>, Eva Polverino <sup>23</sup>, Jose M. Porcel <sup>24</sup>, Lonny Yarmus <sup>25</sup>, Elizabeth P. Belcher <sup>26</sup>, Isabelle Opitz <sup>27</sup> and Najib M. Rahman <sup>1,2,3,28</sup>

<sup>1</sup>Oxford Pleural Unit, Oxford Centre for Respiratory Medicine, Oxford University Hospitals NHS Foundation Trust, Oxford, UK. <sup>2</sup>Oxford Respiratory Trials Unit, University of Oxford, Oxford, UK. <sup>3</sup>NIHR Oxford Biomedical Research Centre, University of Oxford, Oxford, UK. <sup>4</sup>Department of Infection, Immunity and Cardiovascular Disease, University of Sheffield, Sheffield, UK. <sup>5</sup>Unit of Thoracic Surgery, San Camillo Forlanini Hospital, Rome, Italy. <sup>6</sup>PhD Program Alma Mater Studiorum, University of Bologna, Bologna, Italy. <sup>7</sup>Chest Diseases Department, Faculty of Medicine, Alexandria University, Alexandria, Egypt. <sup>8</sup>Department of Thoracic Surgery, Hull University Teaching Hospitals NHS Trust, Hull York Medical School, University of Hull, Hull, UK. <sup>9</sup>Department of Respiratory Medicine, Queen Alexandra Hospital, Portsmouth, UK. <sup>10</sup>Department of Respiratory Medicine, Mater Dei Hospital, Msida, Malta. <sup>11</sup>Department of Respiratory Medicine, Lucus Augusti University Hospital, EOXI Lugo, Cervo y Monforte de Lemos, Lugo, Spain. <sup>12</sup>C039 Biodiscovery Research Group HULA-USC, Health Research Institute of Santiago de Compostela (IDIS), Santiago de Compostela, Spain. <sup>13</sup>Department of Medicine, Section of Pulmonary Medicine, Herlev-Gentofte Hospital, University of Copenhagen, Copenhagen, Denmark. <sup>14</sup>Department of Biomedical Sciences and Public Health, Marche Polytechnic University, Ancona, Italy. <sup>15</sup>Respiratory Diseases Unit, Azienda Ospedaliero-Universitaria "Ospedali Riuniti", Ancona, Italy. <sup>16</sup>Department of Pharmacy and Medicines Management, Oxford University Hospitals NHS Foundation Trust, Oxford, UK. <sup>17</sup>Bodleian Health Care Libraries, University of Oxford, Oxford, UK. <sup>18</sup>Department of Medicine and Health Sciences "V. Tiberio", University of Molise, Campobasso, Italy. <sup>19</sup>Thoracic Surgical Oncology Programme, Policlinico Tor Vergata, Rome, Italy. <sup>20</sup>Department of Internal Medicine, Pulmonary Diseases and Allergy, Medical University of Warsaw, Warsaw, Poland. <sup>21</sup>Thoracic Surgery Department, Heart Institute (InCor) do Hospital das Clínicas da Faculdade de Medicina da Universidade de São Paulo, São Paulo, Brazil. <sup>22</sup>Academic Respiratory Unit, University of Bristol, Bristol, UK. <sup>23</sup>Pneumology Department, Hospital Universitari Vall d'Hebron, Institut de Recerca Vall d'Hebron, Barcelona, Spain. <sup>24</sup>Pleural Medicine Unit, Department of Internal Medicine, Arnau de Vilanova University Hospital, IRBLleida, Lleida, Spain. <sup>25</sup>Division of Pulmonary and Critical Care, Johns Hopkins University School of Medicine, Baltimore, MD, USA. <sup>26</sup>Department of Thoracic Surgery, Oxford University Hospitals NHS Foundation Trust, Oxford, UK. <sup>27</sup>Department of Thoracic Surgery, University Hospital Zurich, Zurich, Switzerland. <sup>28</sup>Chinese Academy of Medical Health Sciences, University of Oxford, Oxford, UK.

Corresponding author: Eihab O. Bedawi (eombedawi1@sheffield.ac.uk)

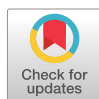

Shareable abstract (@ERSpublications)

**Intrapleural fibrinolytic-based therapy has revolutionised pleural infection management, but surgical intervention remains vital in select patients. Studies into early and targeted escalation of treatment based on risk stratification are now required.** <https://bit.ly/3y6rZ8a>

**Cite this article as:** Bedawi EO, Ricciardi S, Hassan M, et al. ERS/ESTS statement on the management of pleural infection in adults. *Eur Respir J* 2023; 61: 2201062 [DOI: 10.1183/13993003.01062-2022].

This single-page version can be shared freely online.

Copyright ©The authors 2023.  
For reproduction rights and  
permissions contact  
[permissions@ersnet.org](mailto:permissions@ersnet.org)

Received: 14 June 2022  
Accepted: 22 Aug 2022

## Abstract

Pleural infection is a common condition encountered by respiratory physicians and thoracic surgeons alike. The European Respiratory Society (ERS) and European Society of Thoracic Surgeons (ESTS) established a multidisciplinary collaboration of clinicians with expertise in managing pleural infection with the aim of producing a comprehensive review of the scientific literature. Six areas of interest were identified: 1) epidemiology of pleural infection, 2) optimal antibiotic strategy, 3) diagnostic parameters for chest tube drainage, 4) status of intrapleural therapies, 5) role of surgery and 6) current place of outcome prediction in management. The literature revealed that recently updated epidemiological data continue to show an overall upwards trend in incidence, but there is an urgent need for a more comprehensive characterisation of the burden of pleural infection in specific populations such as immunocompromised hosts. There is a sparsity of regular analyses and documentation of microbiological patterns at a local level to inform geographical

variation, and ongoing research efforts are needed to improve antibiotic stewardship. The evidence remains in favour of a small-bore chest tube optimally placed under image guidance as an appropriate initial intervention for most cases of pleural infection. With a growing body of data suggesting delays to treatment are key contributors to poor outcomes, this suggests that earlier consideration of combination intrapleural enzyme therapy (IET) with concurrent surgical consultation should remain a priority. Since publication of the MIST-2 study, there has been considerable data supporting safety and efficacy of IET, but further studies are needed to optimise dosing using individualised biomarkers of treatment failure. Pending further prospective evaluation, the MIST-2 regimen remains the most evidence based. Several studies have externally validated the RAPID score, but it requires incorporating into prospective intervention studies prior to adopting into clinical practice.
